# Supplementary material
Source: publisher figshare collection journal article supplement (https://gsapubs.figshare.com/articles/dataset/_/12542432)
Supplement: Supplementary file 1 [file 1]

## Sheet: Sheet1
Table 1: Data for grain size and rock magnetic properties
Sample ID	Sample Name	Depth (m)	Estimated age (Ma)	MS (SI/g)	IRM (10-4Am2/g)	ARM (10-3Am2/g)	Mean (phi)	Sorting (phi)	Skewness (phi)	Kurtosis (Phi)	Raw Grain size data (micrometer)
											0.448	0.5145	0.5905	0.6775	0.778	0.8935	1.0255	1.1775	1.352	1.5525	1.7825	2.0465	2.35	2.698	3.0975	3.5565	4.0835	4.6885	5.383	6.1805	7.0965	8.148	9.355	10.741	12.3325	14.1595	16.257	18.6655	21.431	24.606	28.2515	32.437	37.2425	42.76	49.095	56.3685	60.256	79.433	85.317
WS Section
WS-10	40	81.5	37.0721	4.50331e-05	6.42691	9.58216	-6.22462	1.71363	0.505791	2.54498	0.075078	0.208228	0.35281	0.465985	0.577184	0.677559	0.780725	0.890809	1.0158	1.1546	1.30436	1.45638	1.60539	1.74855	1.88518	2.01613	2.15083	2.27278	2.38587	2.50033	2.62507	2.77713	2.96701	3.21389	3.5182	3.88882	4.30356	4.7441	5.15848	5.49813	5.69913	5.71151	5.50164	5.06416	4.42707	3.65004	2.80792	1.99329	1.27081
WS-9	36	85.5	37.045	9.10526e-06	0.111053	0.233924	-5.61126	2.15834	0.203641	2.13404	0	0.0642657	0.167055	0.290082	0.408054	0.540354	0.689813	0.858638	1.04982	1.25497	1.46423	1.66055	1.83228	1.97225	2.07825	2.15184	2.06609	2.11075	2.14585	2.17968	2.21946	2.27396	2.34796	2.44776	2.57096	2.71841	2.87951	3.04701	3.2033	3.33519	3.42691	3.47084	3.46568	3.41905	3.34511	3.26092	3.18117	3.11303	3.05603
WS-8	31	90.5	36.935	1.12897e-05	0.818115	3.48186	-5.55795	1.92515	0.566303	2.57639	0	0.108726	0.204653	0.30903	0.395639	0.488673	0.589284	0.704803	0.840226	0.991926	1.15362	1.31276	1.46062	1.59198	1.70557	1.80345	2.00533	2.05402	2.09567	2.13893	2.19056	2.25893	2.34792	2.46469	2.60851	2.78565	2.99191	3.22998	3.4888	3.76086	4.02461	4.25959	4.43719	4.5309	4.51693	4.3808	4.12081	3.75469	3.30708
WS-7	26	95.5	36.7975	6.93988e-06	0.170405	0.704123	-5.7829	1.94714	0.0182658	2.92809	0	0.066467	0.142963	0.231864	0.307478	0.395157	0.499402	0.630402	0.796652	0.996526	1.22501	1.4669	1.70837	1.93559	2.13734	2.30592	2.51056	2.61259	2.69312	2.76146	2.8257	2.89786	2.98588	3.10085	3.2446	3.4231	3.628	3.85298	4.074	4.26652	4.3941	4.42351	4.32578	4.0851	3.70457	3.2094	2.64031	2.05891	1.51158
GS 62	101	101	36.66	6.43837e-06	0.0627688	0.183005	-2.89998	1.80697	1.36566	5.02862	0	0	0	0	0.040892	0.094653	0.113508	0.14023	0.169964	0.20046	0.230249	0.256449	0.277742	0.294199	0.307014	0.317866	0.328403	0.340277	0.354542	0.372507	0.394847	0.42339	0.458903	0.504279	0.56	0.629966	0.714707	0.81848	0.940696	1.08323	1.24189	1.41435	1.59464	1.77979	1.96852	2.16377	2.37575	2.61727	2.90933
WS-6	19	102.5	36.5088	7.42555e-06	0.442902	1.07466	-5.3968	2.23893	-0.0406718	2.18902	0	0.00584733	0.0884507	0.155059	0.22523	0.293237	0.385274	0.506758	0.67204	0.882751	1.13709	1.4205	1.71799	2.01257	2.28859	2.53373	2.23635	2.3314	2.38942	2.4153	2.41533	2.39892	2.37788	2.3646	2.37328	2.41829	2.5106	2.65953	2.86069	3.10409	3.36073	3.5969	3.76957	3.84155	3.78734	3.60285	3.30771	2.94761	2.57405
WS-5	14	107.5	36.4675	8.03628e-06	0.261685	0.769431	-6.33663	1.5404	0.408105	2.46513	0	0.0540265	0.131518	0.208544	0.283245	0.361406	0.459013	0.586674	0.759321	0.980977	1.25211	1.5599	1.89041	2.2262	2.54964	2.84534	3.32506	3.53778	3.69171	3.79483	3.85696	3.89652	3.93136	3.9806	4.0559	4.16536	4.3015	4.44994	4.57782	4.64754	4.61639	4.44949	4.13014	3.66317	3.08029	2.43522	1.78575	1.21053	0.712654
GS 63	110	110	36.33	5.76181e-06	0.120626	0.993216	-5.88537	1.82213	0.426102	2.47368	0	0.10181	0.204889	0.321307	0.416982	0.518649	0.625636	0.745256	0.882951	1.03672	1.20303	1.37262	1.53986	1.70157	1.85716	2.00781	2.15343	2.29639	2.43506	2.5723	2.70639	2.84279	2.98134	3.13029	3.28816	3.46106	3.64293	3.83282	4.01714	4.18445	4.31469	4.39082	4.39577	4.31745	4.14937	3.89248	3.55378	3.15177	2.70177
WS-4	11	110.5	36.2613	2.13349e-06	0.128941	0.389318	-6.82784	1.83785	-0.135565	1.92903	0.051355	0.191296	0.374441	0.549206	0.742154	0.940866	1.15968	1.3976	1.65884	1.92932	2.19172	2.41886	2.59238	2.70361	2.75348	2.74944	3.03002	3.11621	3.1662	3.19224	3.20858	3.23277	3.281	3.36953	3.50526	3.69504	3.927	4.18694	4.43704	4.63718	4.7358	4.68981	4.47049	4.07228	3.51878	2.86113	2.16132	1.51061	0.924259
WS-3	8	113.5	36.2475	5.62028e-06			-6.15631	1.71793	0.498261	2.2307	0	0.008797	0.0937795	0.179512	0.296592	0.416842	0.5775	0.779133	1.03586	1.34062	1.68097	2.02805	2.3573	2.64934	2.89366	3.08826	2.83314	2.84997	2.85131	2.85095	2.86075	2.89068	2.94657	3.03432	3.15346	3.30905	3.49705	3.71809	3.95686	4.19598	4.39966	4.52837	4.53643	4.386	4.05686	3.55742	2.92447	2.23106	1.54541
WS-2	4	117.5	36.165	1.2499e-05	0.269058	1.8422	-4.14928	2.77268	-0.132907	2.10152	0	0	0.0642535	0.11252	0.154952	0.194308	0.246811	0.316014	0.410225	0.529803	0.672974	0.831205	0.996634	1.16106	1.31724	1.45934	1.58095	1.67903	1.74938	1.79217	1.80805	1.80207	1.78301	1.76348	1.76144	1.79784	1.89274	2.06499	2.31726	2.6438	3.01167	3.37836	3.68375	3.87131	3.89565	3.73705	3.4067	2.95057	2.42674
WS-1	2	119.5	36.055	1.4034e-05	0.33175	2.18055	-5.53006	2.13042	-0.315516	3.38955	0	0.110683	0.204818	0.302027	0.375628	0.44919	0.523662	0.60819	0.710137	0.830892	0.96951	1.11921	1.27508	1.43309	1.59069	1.74706	1.90107	2.05589	2.21221	2.37675	2.5502	2.73971	2.94054	3.15542	3.37047	3.58205	3.77316	3.93716	4.0613	4.14082	4.17023	4.14746	4.07046	3.93608	3.74074	3.48246	3.16235	2.79391	2.39216
GS 64	121.5	121.5	36	3.07782e-05			-4.83629	1.53692	1.16149	4.28244	0	0.051752	0.103123	0.136863	0.167317	0.189264	0.211657	0.237613	0.272023	0.315705	0.367682	0.424523	0.48472	0.549203	0.620949	0.703924	0.800644	0.91359	1.03992	1.17792	1.31902	1.46044	1.59434	1.72539	1.8574	2.01201	2.21187	2.49526	2.88894	3.42115	4.08401	4.85202	5.65239	6.391	6.95451	7.23779	7.17138	6.73982	5.98018
GS 65	124	124	35.9517	7.51213e-05	3.80801	8.89309	-4.71544	1.4642	1.44217	5.46731	0	0.0719	0.120133	0.16338	0.191805	0.215397	0.234317	0.252964	0.274421	0.299856	0.32899	0.360279	0.393851	0.43189	0.477705	0.534407	0.602938	0.683024	0.769911	0.859795	0.945935	1.02832	1.10848	1.20104	1.32456	1.51372	1.79978	2.22524	2.80663	3.55716	4.43951	5.40018	6.33794	7.1422	7.6963	7.90584	7.72083	7.1499	6.24941
GS 66	129	129	35.8551	0.000105356	11.4036	30.6498	-4.65801	1.49612	1.35756	4.96148	0	0.057082	0.106237	0.137793	0.164999	0.184009	0.201685	0.220888	0.24557	0.276458	0.312718	0.351891	0.393527	0.439734	0.494417	0.561971	0.644977	0.74515	0.858694	0.982108	1.10545	1.22396	1.32941	1.42546	1.51798	1.62968	1.78804	2.03564	2.40677	2.93778	3.63042	4.4694	5.38956	6.30046	7.08331	7.61536	7.79866	7.57701	6.95044
GS 67	131	131	35.8164	8.87955e-05	13.5111	34.0799	-4.73336	1.38207	1.56952	6.13984	0	0.078634	0.127044	0.167826	0.192844	0.211243	0.223122	0.232814	0.243251	0.255899	0.270707	0.286898	0.305452	0.329747	0.36443	0.414038	0.481076	0.566696	0.667109	0.779108	0.894755	1.01276	1.13061	1.2603	1.4158	1.63072	1.93606	2.37813	2.979	3.75926	4.68658	5.70865	6.71717	7.58705	8.18073	8.38177	8.12321	7.40921	6.30627
GS 68	134	134	35.7585	9.61416e-05	13.4259	35.6308	-4.85649	1.467	1.24763	4.81267	0	0.071002	0.119013	0.160622	0.185431	0.204298	0.217971	0.232007	0.250458	0.27542	0.307136	0.344224	0.386858	0.437303	0.499187	0.576376	0.670698	0.783503	0.910921	1.05088	1.19575	1.34569	1.49746	1.66286	1.85128	2.09065	2.40137	2.81702	3.34656	3.99837	4.73823	5.52036	6.26075	6.86871	7.24945	7.32789	7.06642	6.47836	5.61465
GS 69	138	138	35.6812	4.92848e-05	7.14889	14.2556	-4.7678	1.40095	1.4668	5.9341	0	0.090746	0.143019	0.185291	0.210505	0.227526	0.236435	0.241831	0.247012	0.254136	0.263751	0.27561	0.290791	0.312444	0.344881	0.392477	0.457979	0.543286	0.645972	0.764854	0.89422	1.03569	1.18829	1.36633	1.58152	1.86548	2.23982	2.74078	3.37448	4.14657	5.01255	5.91494	6.75288	7.41981	7.80822	7.838	7.47641	6.75372	5.74378
GS 70	141	141	35.6232	7.98761e-05			-4.66097	1.43149	1.35771	5.41988	0	0.06388	0.107019	0.144664	0.167461	0.184832	0.197092	0.208706	0.222681	0.240322	0.261335	0.284416	0.309992	0.340829	0.381118	0.435219	0.50578	0.59461	0.698902	0.816811	0.941459	1.07238	1.20604	1.35223	1.51935	1.73383	2.01767	2.40777	2.9209	3.57527	4.34718	5.1991	6.0491	6.80254	7.35353	7.61008	7.51601	7.06435	6.29297
GS 71	145	145	35.5459	0.000110919	5.85688	14.5388	-4.65985	1.45645	1.43963	5.47164	0	0.066023	0.11611	0.161054	0.186656	0.205216	0.217043	0.228175	0.242765	0.262964	0.288639	0.317909	0.35033	0.387771	0.433661	0.491699	0.563807	0.65099	0.749524	0.856391	0.963913	1.07031	1.17229	1.27906	1.40177	1.5684	1.80639	2.15696	2.64372	3.29083	4.08062	4.98016	5.90833	6.76644	7.43752	7.81266	7.81685	7.42489	6.66391
GS 72	147	147	35.5072	1.26407e-05	1.95909	3.76869	-4.95754	1.52154	1.13661	4.43297	0	0.072109	0.128034	0.181152	0.215824	0.24477	0.267398	0.288844	0.312741	0.340883	0.373565	0.409647	0.449684	0.496423	0.554185	0.62791	0.721007	0.836854	0.973836	1.13228	1.30555	1.4945	1.69278	1.90923	2.14526	2.42233	2.75151	3.1592	3.64894	4.22624	4.85986	5.5097	6.10396	6.56632	6.81923	6.80462	6.49769	5.91824	5.1144
GS 73	149	149	35.4686	3.72288e-05	6.19447	12.101	-5.22039	1.6489	0.74899	3.66628	0	0.09497	0.168102	0.238474	0.285917	0.326095	0.357589	0.386315	0.416697	0.451413	0.491909	0.538181	0.592107	0.657461	0.738999	0.841622	0.968091	1.12182	1.30075	1.50652	1.73256	1.98214	2.24778	2.53887	2.84962	3.19424	3.56789	3.97989	4.41436	4.85884	5.27366	5.61729	5.83486	5.87844	5.71395	5.33561	4.76955	4.08222	3.34821
GS 74	150.5	150.5	35.4396	1.86782e-05			-5.22622	1.46978	1.2268	4.62085	0	0.093881	0.162741	0.227429	0.270241	0.30524	0.331036	0.353086	0.375469	0.400935	0.431074	0.466361	0.508923	0.562595	0.631799	0.72045	0.829696	0.960265	1.10771	1.27122	1.4454	1.63613	1.84563	2.09483	2.39607	2.78181	3.26215	3.85779	4.54666	5.30317	6.0517	6.71114	7.17742	7.36195	7.20289	6.68778	5.85653	4.81027	3.66093
GS 75	159	159	35.2754	3.7692e-05	7.55994	18.9734	-5.05134	1.44478	1.27742	4.99848	0	0.092309	0.153141	0.20655	0.239875	0.264944	0.281289	0.294291	0.307902	0.324751	0.345925	0.371416	0.402671	0.443028	0.496779	0.568241	0.659882	0.774045	0.908494	1.06374	1.23489	1.42646	1.63765	1.88505	2.17648	2.54085	2.98869	3.54457	4.19681	4.93312	5.69326	6.40881	6.98149	7.3203	7.35076	7.03867	6.39813	5.50125	4.44059
GS 76	162	162	35.2174	9.074e-05	11.096	28.6164	-5.13485	1.463	1.21551	4.11177	0	0	0.051941	0.1086	0.171714	0.216548	0.263482	0.308128	0.356012	0.407413	0.463047	0.521623	0.583706	0.651803	0.730469	0.825434	0.940655	1.08003	1.24082	1.42114	1.60914	1.7988	1.97528	2.13825	2.28562	2.43792	2.62157	2.88496	3.27158	3.82957	4.56897	5.47435	6.46318	7.40605	8.12193	8.41055	8.09269	7.08344	5.32865
GS 77	167	167	35.1208	3.72844e-05	11.2438	28.3176	-4.81565	1.51115	1.37349	4.96203	0	0.075089	0.127344	0.175152	0.207074	0.234425	0.257477	0.281138	0.308891	0.34195	0.380017	0.421309	0.466024	0.516601	0.576676	0.649595	0.736011	0.835124	0.940491	1.04645	1.14325	1.22817	1.30015	1.3719	1.46267	1.60838	1.84595	2.22314	2.76444	3.48848	4.36175	5.32996	6.28646	7.11129	7.67657	7.87839	7.66252	7.04118	6.08043
GS 78	171	171	35.0435	9.72441e-05	12.3034	33.2158	-4.74716	1.47005	1.45757	5.40751	0	0.079237	0.130007	0.174278	0.202774	0.225561	0.242901	0.259471	0.27861	0.301824	0.329101	0.359227	0.392742	0.432426	0.482355	0.546504	0.62641	0.722043	0.827617	0.937619	1.04166	1.13592	1.21733	1.29708	1.39279	1.5401	1.77665	2.15229	2.69471	3.42633	4.31687	5.31427	6.31168	7.18683	7.80718	8.06277	7.89277	7.3016	6.34884
GS 79	176	176	34.9469	7.30319e-05			-4.68851	1.52673	1.39222	4.97579	0	0.068228	0.116686	0.161357	0.191173	0.21691	0.238868	0.261699	0.288646	0.320656	0.35708	0.395674	0.43604	0.480206	0.532048	0.59606	0.675015	0.770684	0.87924	0.996705	1.11261	1.22122	1.31398	1.39411	1.46891	1.56281	1.70704	1.94789	2.32356	2.87262	3.59625	4.47599	5.44015	6.39013	7.19834	7.73511	7.89975	7.63871	6.95905
GS 80	180	180	34.8696	5.72011e-05	8.54035	22.7368	-5.04884	1.57808	1.1725	4.18983	0	0.087157	0.14887	0.206262	0.245508	0.28008	0.310376	0.342328	0.380464	0.426596	0.480782	0.540657	0.605486	0.676379	0.755769	0.846279	0.948153	1.06111	1.17966	1.3004	1.41602	1.52741	1.63546	1.75528	1.90314	2.11129	2.40513	2.81942	3.36106	4.03232	4.7889	5.57334	6.29085	6.84425	7.13957	7.11087	6.73539	6.0451	5.10577
GS 81	185	185	34.7729	8.25937e-05	11.0282	29.5308	-5.09783	1.67925	1.03451	3.58625	0	0.085811	0.151915	0.216439	0.262546	0.305631	0.34602	0.38988	0.441844	0.503112	0.573174	0.64878	0.728976	0.815277	0.911137	1.02051	1.14449	1.28321	1.42952	1.57724	1.71317	1.83116	1.92327	1.99507	2.05725	2.1366	2.26566	2.48786	2.83481	3.3331	3.97041	4.71382	5.48384	6.18163	6.69244	6.91269	6.77608	6.27271	5.44599
GS 82	189	189	34.6957	0.00011165	14.6108	33.6471	-4.98512	1.66406	1.10907	3.81153	0	0.083489	0.144866	0.20342	0.244756	0.282824	0.318194	0.356823	0.403339	0.459283	0.524541	0.596271	0.673411	0.756749	0.848547	0.951393	1.06524	1.18935	1.31671	1.44147	1.5522	1.64395	1.71168	1.76289	1.81185	1.88787	2.02576	2.26996	2.65098	3.19382	3.88223	4.67972	5.50271	6.25058	6.80918	7.07802	6.99499	6.55107	5.78597
GS 83	194	194	34.599	0.000100864	12.6291	30.2121	-5.14824	1.56855	1.08667	4.02502	0	0.093383	0.156224	0.212234	0.248635	0.27916	0.3049	0.332852	0.368664	0.415327	0.473785	0.542004	0.619014	0.705024	0.801121	0.908469	1.02578	1.15199	1.28133	1.41153	1.53719	1.66258	1.7918	1.94415	2.13692	2.40276	2.76025	3.235	3.81775	4.49431	5.20517	5.88401	6.43921	6.78861	6.86576	6.63903	6.11748	5.3585	4.43696
GS 84	195	195	34.5797	0.000183129	50.2258	140.321	-5.15644	1.5243	1.02405	4.0371	0	0.078839	0.138158	0.192728	0.22668	0.25412	0.275396	0.297242	0.324824	0.361135	0.407236	0.46186	0.525006	0.598205	0.684129	0.786069	0.905793	1.04628	1.20597	1.38703	1.58462	1.80292	2.03711	2.29777	2.5825	2.90787	3.27389	3.69579	4.16532	4.6796	5.20617	5.7091	6.12967	6.40758	6.48353	6.31555	5.88933	5.23181	4.39258
	199	199	34.505	0.000105909	13.9452	35.9407	0
GS 85	203	203	34.4251	9.87708e-05	12.4462	37.2435	-4.60101	1.40785	1.64604	6.3372	0	0.078348	0.123738	0.16086	0.184037	0.201625	0.214371	0.22658	0.241239	0.259529	0.281082	0.304572	0.330453	0.361374	0.400944	0.452206	0.515647	0.589885	0.668667	0.746028	0.8134	0.86852	0.912794	0.960413	1.0342	1.17292	1.4169	1.81675	2.39856	3.18334	4.13875	5.21414	6.30471	7.29105	8.03941	8.43181	8.39305	7.90636	7.01191
GS 86	208	208	34.3285	9.95263e-05	15.5298	44.2002	-4.56277	1.52204	1.56973	5.59778	0	0.072091	0.120479	0.165262	0.197285	0.226346	0.252565	0.27956	0.309524	0.342125	0.375712	0.407604	0.437611	0.468457	0.504634	0.550728	0.609311	0.68116	0.761837	0.846059	0.923699	0.988421	1.03399	1.0642	1.09098	1.14157	1.25366	1.47867	1.861	2.44471	3.23456	4.21447	5.30983	6.41483	7.38816	8.08201	8.37786	8.20579	7.56488
GS 87	212	212	34.2512	0.000125493	15.3129	38.3126	-4.66985	1.55795	1.36118	4.73531	0	0.061595	0.108306	0.152729	0.183038	0.210377	0.235126	0.26186	0.293664	0.331057	0.373078	0.417291	0.463588	0.514571	0.574644	0.648481	0.738378	0.845222	0.963469	1.08727	1.20377	1.30476	1.37965	1.42916	1.46064	1.49779	1.57611	1.74579	2.05418	2.54816	3.23899	4.11515	5.10861	6.12006	7.0167	7.65951	7.93643	7.78028	7.18684
GS 88	216	216	34.1739	0.000105682	17.3448	33.6312	-4.70973	2.13057	0.918905	2.77463	0	0.10585	0.189845	0.283007	0.365865	0.453367	0.542159	0.632686	0.724554	0.813059	0.894163	0.962894	1.01896	1.06623	1.11158	1.16256	1.22483	1.30233	1.39364	1.49711	1.6056	1.71534	1.8159	1.90092	1.95649	1.97223	1.93785	1.84919	1.71573	1.55926	1.42506	1.37404	1.47948	1.80912	2.40355	3.2535	4.29408	5.38432	6.3592
GS 89	225	225	34	6.82024e-05			-4.26586	1.56868	1.43604	4.86976	0	0	0.064948	0.10602	0.132385	0.152125	0.171959	0.192831	0.218375	0.249567	0.286747	0.328545	0.374255	0.42355	0.476394	0.533233	0.594446	0.662247	0.737894	0.825357	0.925027	1.03996	1.16471	1.29658	1.4216	1.5326	1.61904	1.68391	1.73995	1.81927	1.96915	2.2534	2.73274	3.45105	4.40556	5.53005	6.70159	7.73	8.42415
LTG Section
gs118	156	47.5488	36.7186	1.50148e-05	2.23295	2.46816	-6.57503	1.76241	0.170948	2.13666	0	0.14525	0.28542	0.456047	0.613552	0.785544	0.969934	1.17325	1.40288	1.65538	1.92623	2.20088	2.46882	2.7221	2.95686	3.17175	3.36268	3.52726	3.65641	3.74367	3.77968	3.76166	3.69408	3.587	3.46303	3.34352	3.25831	3.22918	3.27037	3.37893	3.52906	3.67709	3.76303	3.72641	3.52001	3.12746	2.57026	1.91932	1.24715
gs119	174	53.0352	36.6558	5.91383e-06	0.404253	1.84756	-6.07703	1.82477	0.44488	2.35708	0	0.149246	0.278865	0.420044	0.536421	0.657023	0.780028	0.913087	1.06253	1.22741	1.40557	1.58829	1.76956	1.94462	2.11073	2.26657	2.40928	2.53844	2.65038	2.74603	2.82473	2.89316	2.95813	3.0333	3.12847	3.25734	3.42339	3.63108	3.86793	4.1187	4.35074	4.53012	4.61738	4.57934	4.39295	4.05279	3.57162	2.98931	2.34963
gs120	186	56.6928	36.6138	3.84393e-06	0.144327	0.571104	-5.45378	1.72504	0.743581	3.03987	0	0.075298	0.158011	0.249976	0.319394	0.388218	0.454522	0.524598	0.602793	0.689238	0.782838	0.879512	0.978165	1.08003	1.18788	1.305	1.43268	1.57323	1.72412	1.88654	2.05567	2.23501	2.42101	2.62266	2.83849	3.08093	3.34909	3.65253	3.98317	4.3365	4.68787	5.01134	5.2673	5.41648	5.42114	5.25476	4.90765	4.39737	3.75466
gs121	212	64.6176	36.523	1.83197e-05			-5.64352	1.89028	0.542303	2.51684	0	0.123765	0.224651	0.330003	0.413803	0.499391	0.587111	0.684972	0.799612	0.931499	1.07943	1.23651	1.398	1.55991	1.71916	1.87314	2.01698	2.14759	2.25818	2.34626	2.40812	2.44743	2.47099	2.49347	2.53279	2.61192	2.74994	2.96636	3.26262	3.6338	4.04719	4.46201	4.8179	5.05541	5.12086	4.98124	4.63268	4.10947	3.46489
gs122	215	65.532	36.5125	1.00809e-05	0.847105	3.18387	-5.80689	1.84367	0.658074	2.59139	0	0.1558	0.310415	0.419819	0.538775	0.644283	0.751226	0.859039	0.973694	1.09346	1.21672	1.33789	1.45488	1.56795	1.67919	1.79099	1.90328	2.01619	2.1252	2.22821	2.32004	2.40305	2.48041	2.56602	2.67354	2.82586	3.0376	3.32645	3.68707	4.10815	4.54731	4.95528	5.26564	5.41764	5.3624	5.07716	4.57002	3.88947	3.09837
gs123	346	105.461	36.0549	6.02086e-05	2.77496	11.9229	-5.78659	1.69333	0.737585	3.01912	0	0.149453	0.254676	0.357089	0.435495	0.511533	0.585662	0.665808	0.757983	0.862372	0.976791	1.09439	1.21115	1.32573	1.4392	1.55424	1.67269	1.79856	1.93269	2.08052	2.24317	2.43056	2.64511	2.90156	3.19819	3.54632	3.93284	4.35377	4.77673	5.17301	5.49235	5.6896	5.71878	5.54897	5.16989	4.59936	3.87904	3.08268	2.27992
gs124	366	111.557	35.985	1.24238e-05	1.14775	3.18461	-6.25326	1.71284	0.378519	2.25619	0	0.086379	0.184658	0.307486	0.418508	0.540485	0.673692	0.826071	1.00622	1.21403	1.44764	1.69566	1.94885	2.19868	2.4391	2.66582	2.8717	3.05226	3.19748	3.30256	3.3613	3.37721	3.36068	3.33067	3.31307	3.33492	3.42009	3.58617	3.82928	4.13007	4.43721	4.68672	4.80211	4.71884	4.39893	3.84727	3.11146	2.29097	1.47448
gs125	396	120.701	35.8802	1.27777e-05	0.988031	3.45229	-6.16078	1.85	0.462102	2.19178	0	0.151001	0.31983	0.450427	0.593093	0.728769	0.874017	1.02965	1.20367	1.39351	1.5965	1.80238	2.00364	2.19351	2.36698	2.52006	2.64675	2.74291	2.80193	2.8211	2.80055	2.74709	2.67797	2.61578	2.59289	2.64171	2.78983	3.05783	3.43752	3.90538	4.39824	4.84266	5.14862	5.23958	5.06368	4.61154	3.91833	3.07039	2.16446
gs126	405	123.444	35.8488	1.14569e-05	2.12639	5.531	-6.12689	1.9087	0.439983	2.10659	0	0.159241	0.302226	0.464042	0.604467	0.754693	0.911853	1.08207	1.27045	1.47327	1.68616	1.8973	2.09817	2.2816	2.4428	2.57828	2.68274	2.75217	2.78034	2.76362	2.7024	2.60243	2.48316	2.36793	2.29449	2.29885	2.41597	2.67226	3.06529	3.57483	4.13666	4.67355	5.08698	5.29106	5.22391	4.86697	4.24853	3.44756	2.5609
gs127	419	127.711	35.8	7.51277e-06	0.451321	1.86415	-5.65912	1.843	0.557774	2.58566	0	0.087817	0.185772	0.298334	0.389131	0.483991	0.581018	0.686817	0.806128	0.937455	1.07801	1.22017	1.35956	1.49413	1.6241	1.75095	1.87459	1.99654	2.11439	2.22915	2.33814	2.44572	2.55374	2.67333	2.81025	2.97871	3.18249	3.43016	3.71273	4.02056	4.32469	4.59527	4.79357	4.88582	4.8449	4.65733	4.32508	3.87216	3.32837
gs128	430	131.064	35.7507	1.07266e-05	1.04998	3.17545	-6.33763	1.81665	0.298003	2.0271	0	0.083759	0.194688	0.34382	0.488575	0.655118	0.843055	1.05794	1.30547	1.57825	1.86682	2.15058	2.41379	2.64457	2.83683	2.98843	3.0972	3.16356	3.18601	3.16509	3.10445	3.01154	2.90513	2.8055	2.74295	2.74374	2.83216	3.02547	3.31921	3.69507	4.10031	4.46927	4.71781	4.76981	4.57099	4.10894	3.41739	2.58902	1.71229
gs129	445	135.636	35.6837	7.79496e-06	0.741898	2.77484	-5.92609	1.91501	0.69857	2.51608	0.130725	0.282013	0.450299	0.589713	0.728307	0.852067	0.970262	1.08193	1.19209	1.29987	1.40537	1.50544	1.59952	1.68836	1.7737	1.85688	1.93671	2.01127	2.07504	2.12441	2.15626	2.17493	2.1916	2.22753	2.30861	2.46747	2.7264	3.10646	3.59492	4.16762	4.7571	5.28801	5.66693	5.81582	5.68223	5.25706	4.57557	3.72376	2.79563
gs130	460	140.208	35.6167	1.09581e-05	0.875992	3.04315	-5.99778	1.92055	0.685633	2.49406	0.180661	0.3401	0.513771	0.656055	0.794501	0.915477	1.02859	1.13365	1.23626	1.33616	1.43355	1.52527	1.61073	1.69143	1.77068	1.85192	1.93587	2.0217	2.10354	2.17691	2.23655	2.28515	2.33013	2.38987	2.48537	2.64525	2.88796	3.2321	3.66643	4.17071	4.68758	5.15336	5.48765	5.62072	5.50111	5.1116	4.47292	3.65119	2.72865
gs131	470	143.256	35.572	8.84784e-06	0.580499	2.27657	-6.36156	1.75398	0.25506	2.11928	0	0.073889	0.178017	0.317126	0.447471	0.593681	0.754736	0.937324	1.14913	1.38806	1.65118	1.92585	2.20261	2.47282	2.73012	2.96957	3.18258	3.36275	3.49743	3.5786	3.59782	3.55539	3.46242	3.33646	3.21006	3.1136	3.08316	3.14491	3.3095	3.56848	3.88036	4.18367	4.39445	4.43157	4.23473	3.78822	3.12759	2.34933	1.54792
gs132	480	146.304	35.5273	3.34605e-05	1.81945	3.12786	-6.33092	1.78371	0.30661	2.10185	0	0.08486	0.193938	0.338136	0.475422	0.631303	0.80524	1.00326	1.23153	1.48425	1.75363	2.02167	2.27512	2.50462	2.70613	2.87902	3.02145	3.13348	3.21076	3.25092	3.2511	3.21397	3.15078	3.07809	3.02247	3.01026	3.06829	3.21735	3.45901	3.77915	4.12966	4.4463	4.64525	4.64971	4.40692	3.91041	3.20554	2.39406	1.5868
gs135	490	149.352	35.4827	8.54091e-06	0.777082	2.42467	-6.11858	1.9005	0.546864	2.31399	0.075867	0.230359	0.408001	0.559666	0.718484	0.870221	1.02634	1.18476	1.34925	1.51371	1.67259	1.81566	1.93746	2.0361	2.11292	2.17085	2.21277	2.24238	2.26253	2.27772	2.29383	2.32113	2.37259	2.46673	2.61706	2.84127	3.13951	3.51335	3.93519	4.37467	4.77405	5.07737	5.22384	5.16884	4.89025	4.39819	3.73218	2.96801	2.18144
	495	150.9	35.46	8.54365e-06
gs133	500	152.4	35.438	1.19605e-05	0.878505	3.81175	-5.1998	1.72449	0.870974	3.51978	0	0.092593	0.171648	0.254102	0.316161	0.375034	0.428497	0.481447	0.537581	0.597962	0.662881	0.73037	0.800166	0.873171	0.950912	1.03487	1.12483	1.22134	1.32224	1.42919	1.54198	1.669	1.81662	2.00324	2.23816	2.5425	2.91707	3.37024	3.87998	4.42703	4.96266	5.4413	5.80477	6.00465	6.00323	5.78416	5.35515	4.7557	4.03618
gs134	510	155.448	35.3933	9.78817e-06	0.859629	3.82765	-5.91956	1.74146	0.591727	2.54889	0	0.101608	0.203795	0.317247	0.40795	0.503365	0.603836	0.718365	0.854051	1.01041	1.18465	1.36691	1.54968	1.72663	1.89344	2.04745	2.18501	2.30572	2.40728	2.49307	2.5663	2.63793	2.7191	2.82854	2.97897	3.18872	3.45994	3.7968	4.17706	4.5757	4.94176	5.22403	5.36427	5.3166	5.05433	4.5808	3.92835	3.1665	2.36612
	520	158.496	35.3486		1.01005	2.86935
gs136	530	161.544	35.304	1.00806e-05	0.731116	2.44081	-5.7543	1.86549	0.752399	2.80133	0.098318	0.229859	0.374655	0.49149	0.606006	0.706753	0.803116	0.895748	0.990006	1.08546	1.18169	1.27502	1.36446	1.45106	1.53734	1.62578	1.71608	1.80699	1.89274	1.96994	2.0348	2.09218	2.1515	2.2342	2.36337	2.57149	2.87771	3.30181	3.82697	4.42561	5.0258	5.5492	5.90161	6.00738	5.82019	5.34003	4.6126	3.73468	2.80928
gs137	540	164.592	35.2593	1.0588e-05	0.47539	2.11807	-7.17334	1.47618	-0.162624	2.4126	0	0.041154	0.140404	0.293113	0.456162	0.661714	0.91895	1.24077	1.64126	2.11107	2.63423	3.17107	3.68598	4.14676	4.53113	4.82664	5.02492	5.127	5.13464	5.05434	4.89786	4.67582	4.41257	4.12057	3.8277	3.54065	3.27782	3.03812	2.82428	2.62231	2.41953	2.19726	1.94487	1.65712	1.34048	1.01219	0.691842	0.426343	0.185646
gs138	550	167.64	35.2146	1.16379e-05	0.954654	4.57438	-5.47551	1.6826	0.223502	4.29906	0	0.119662	0.198525	0.268478	0.314384	0.352876	0.385064	0.419006	0.460758	0.512794	0.574764	0.642959	0.715455	0.792978	0.878914	0.978912	1.09893	1.2479	1.43133	1.65976	1.93437	2.26607	2.64733	3.08738	3.56465	4.07934	4.59745	5.104	5.55561	5.92162	6.15668	6.2259	6.1	5.76593	5.23207	4.53218	3.71702	2.86236	2.03031
gs139	560	170.688	35.17	1.12424e-05	0.898139	3.85051	-5.80294	1.86763	0.779824	2.73213	0.1191	0.254447	0.402524	0.522271	0.639301	0.742258	0.840724	0.935531	1.03231	1.1307	1.23017	1.32644	1.41759	1.50372	1.58685	1.66957	1.75243	1.83552	1.91492	1.98881	2.05443	2.11634	2.18194	2.26932	2.39701	2.59314	2.87462	3.26139	3.74236	4.29845	4.87001	5.38968	5.77035	5.9363	5.83273	5.44378	4.79556	3.96423	3.03619
gs140	575	175.26	35.103	8.39035e-06	0.469843	2.03781	-6.95625	1.72311	-0.108066	2.03554	0	0.092954	0.215807	0.39602	0.592162	0.830269	1.1132	1.44665	1.8392	2.27815	2.74621	3.20512	3.62105	3.96531	4.22077	4.38023	4.44184	4.4102	4.29325	4.09966	3.84892	3.55757	3.26238	2.98717	2.77072	2.63106	2.58803	2.64485	2.78854	2.9874	3.18408	3.31289	3.30901	3.13155	2.77544	2.27594	1.69877	1.12267	0.645207
gs141	600	182.88	34.9913	1.60025e-05	2.05852	3.85722	-6.56949	1.61502	0.0987674	2.27489	0	0.062178	0.148897	0.260393	0.360829	0.475946	0.611178	0.779964	0.996582	1.26382	1.58077	1.93233	2.30454	2.68222	3.05155	3.40054	3.71339	3.97981	4.18314	4.31569	4.36869	4.34459	4.25479	4.11578	3.95659	3.79957	3.67326	3.59181	3.56124	3.56856	3.58535	3.57148	3.4839	3.28728	2.96544	2.52863	2.00999	1.47024	0.955985
gs142	610	185.928	34.9466	1.722e-05	1.1373	5.29663	-6.16046	1.81426	0.449083	2.30076	0	0.148944	0.286348	0.439985	0.568254	0.702194	0.838875	0.985501	1.14797	1.32456	1.51262	1.70282	1.88888	2.06604	2.23179	2.38503	2.52273	2.64363	2.74285	2.8193	2.87124	2.90437	2.92828	2.96019	3.01904	3.1273	3.29845	3.54287	3.84656	4.18571	4.50871	4.75949	4.87553	4.80855	4.53363	4.06	3.42822	2.71412	1.99019
gs143	630	192.024	34.8573	1.46179e-05	1.51019	3.85129	-6.17216	1.88788	0.557898	2.28757	0.081665	0.242107	0.427853	0.587686	0.75473	0.912818	1.07225	1.22973	1.38888	1.54479	1.69418	1.8297	1.94818	2.0491	2.1344	2.20683	2.26763	2.31785	2.35604	2.38228	2.39793	2.41026	2.43223	2.48458	2.58908	2.77234	3.04662	3.42192	3.87412	4.36921	4.83697	5.20504	5.39419	5.34617	5.03341	4.47134	3.71351	2.8546	1.98825
gs117	645	196.596	34.7903	2.61639e-05	3.82436	9.96223	-5.70707	1.89324	0.544099	2.44639	0	0.114483	0.220061	0.336235	0.431091	0.530175	0.632655	0.745714	0.874912	1.01901	1.17541	1.33614	1.49652	1.65375	1.80677	1.95498	2.095	2.22414	2.33468	2.4217	2.47811	2.50382	2.50325	2.48939	2.48319	2.51167	2.60369	2.78822	3.07728	3.47232	3.94079	4.43551	4.88199	5.2034	5.32818	5.21007	4.83981	4.25512	3.51879
gs144	660	201.168	34.7232	1.57364e-05	1.62882	4.08988	-6.10162	1.8771	0.370662	2.16188	0	0.103337	0.21391	0.352793	0.482591	0.627245	0.785989	0.964427	1.16791	1.39085	1.62571	1.85642	2.07186	2.26496	2.43315	2.57655	2.69424	2.78623	2.84806	2.87609	2.8663	2.81962	2.74665	2.66392	2.60019	2.5852	2.65135	2.82697	3.12154	3.52983	4.00721	4.48902	4.88053	5.08794	5.03492	4.6894	4.07458	3.27714	2.40474
gs145	670	204.216	34.6786	3.05307e-05	4.44349	10.2243	-5.79608	1.66985	0.568847	3.06899	0	0.128414	0.223884	0.315931	0.381879	0.443483	0.501639	0.565544	0.642453	0.734746	0.842416	0.961069	1.08887	1.22628	1.37562	1.54036	1.72158	1.92232	2.13911	2.37364	2.61819	2.87586	3.13787	3.41114	3.68637	3.97077	4.25402	4.53648	4.80036	5.03052	5.19725	5.27157	5.22274	5.02768	4.67652	4.17884	3.56165	2.8791	2.18334
gs146	680	207.264	34.6339	1.71916e-05			-5.88403	1.83567	0.572865	2.40849	0	0.124141	0.241815	0.373195	0.481174	0.593333	0.707307	0.829828	0.966143	1.11489	1.27387	1.4356	1.59609	1.75329	1.90696	2.05726	2.20127	2.3365	2.45499	2.55148	2.61804	2.6543	2.66452	2.66294	2.67163	2.71972	2.83635	3.04999	3.36835	3.78667	4.26326	4.74162	5.13984	5.37765	5.38603	5.12739	4.60521	3.87587	3.01702
gs147	690	210.312	34.5892	1.1775e-05	0.962055	3.26651	-5.40351	1.57167	0.888586	3.55772	0	0.073639	0.142393	0.212964	0.261809	0.306876	0.347654	0.391036	0.442246	0.503455	0.575164	0.654904	0.741884	0.836776	0.94145	1.05855	1.18927	1.33672	1.50001	1.68311	1.88382	2.10976	2.359	2.64448	2.96233	3.32573	3.72523	4.16438	4.62002	5.07491	5.48764	5.81968	6.02308	6.0579	5.895	5.52555	4.9625	4.25118	3.44371
gs148	700	213.36	34.5446	1.33368e-05	2.31707	5.37195	-5.97066	1.88618	0.531577	2.37724	0	0.170078	0.337738	0.45779	0.591619	0.714739	0.844448	0.980096	1.12798	1.28437	1.44541	1.60207	1.74964	1.88605	2.01127	2.12584	2.2283	2.3177	2.38977	2.44293	2.47572	2.49312	2.50505	2.52909	2.58633	2.7027	2.89647	3.18483	3.55922	4.00172	4.46023	4.87499	5.16998	5.2787	5.15306	4.77969	4.18353	3.43571	2.61852
gs149	710	216.408	34.5	2.03086e-05	3.22997	7.16773	-5.8736	1.81965	0.624435	2.53629	0	0.156264	0.279198	0.407858	0.512219	0.618001	0.723737	0.836358	0.961076	1.09643	1.2396	1.38296	1.52268	1.65773	1.78926	1.91902	2.04614	2.17006	2.28507	2.3882	2.47366	2.54345	2.60165	2.66304	2.74465	2.87229	3.06541	3.34501	3.70788	4.14172	4.59931	5.0233	5.33677	5.46896	5.36504	5.00415	4.40538	3.63741	2.78324
gs150	720	219.456	34.4552	3.17e-05	2.26873	2.46755	-5.77137	1.96146	0.507726	2.52723	0	0.171348	0.334782	0.449182	0.576843	0.691386	0.80901	0.928485	1.0561	1.18988	1.32818	1.46457	1.59551	1.71906	1.83492	1.94309	2.04124	2.12704	2.19442	2.23935	2.25815	2.25383	2.23695	2.22649	2.24953	2.33857	2.52197	2.82626	3.24974	3.77761	4.35239	4.90435	5.34003	5.57489	5.54374	5.22126	4.62831	3.8401	2.95048
gs6	730	222.504	34.4105	1.00515e-05	3.00089	6.71416	-5.63532	1.74239	0.762215	2.97076	0	0.155849	0.258603	0.35512	0.427366	0.494781	0.55762	0.62347	0.698335	0.783678	0.879206	0.98123	1.08902	1.20419	1.32965	1.46822	1.61955	1.78333	1.9525	2.12322	2.28513	2.43754	2.57694	2.71482	2.86081	3.0389	3.26528	3.5623	3.92942	4.35989	4.81331	5.23908	5.5654	5.72401	5.65904	5.34466	4.79167	4.05753	3.21606
EF Section
gs33	0.4	125.5	33.7152	7.12927e-05	5.88147	10.831	-5.27338	1.71908	0.904433	3.25626	0	0	0.149333	0.244533	0.331982	0.39643	0.455417	0.509412	0.565643	0.629814	0.703518	0.786462	0.875121	0.96841	1.06727	1.17373	1.28973	1.41449	1.54739	1.68245	1.81678	1.94322	2.06374	2.18006	2.30825	2.46367	2.67561	2.96284	3.34967	3.83071	4.39382	4.98606	5.5453	5.98605	6.23039	6.21665	5.91865	5.35129	4.57844
gs34	4	129	33.6427	6.0991e-05	8.69611	24.8914	-5.8416	1.79066	0.839549	2.84877	0	0.204953	0.369608	0.510353	0.642952	0.75608	0.854254	0.941293	1.02098	1.09949	1.17882	1.26035	1.34207	1.42362	1.50611	1.59178	1.68272	1.77828	1.87728	1.97481	2.07035	2.16439	2.269	2.39892	2.58248	2.8388	3.1949	3.64724	4.19153	4.77786	5.3527	5.82903	6.12943	6.18188	5.94508	5.41434	4.62717	3.65239	2.58831
gs35	7.5	132.5	33.5701	9.31606e-06	1.81285	4.86303	-5.72453	1.73306	0.847399	2.89056	0	0.063353	0.192042	0.336091	0.45332	0.570926	0.677572	0.78346	0.889233	1.00016	1.1144	1.22956	1.33896	1.43874	1.52789	1.60845	1.68394	1.75672	1.82928	1.90142	1.97635	2.05818	2.16046	2.29794	2.4973	2.77373	3.15072	3.62075	4.17859	4.77559	5.36283	5.85919	6.1932	6.29573	6.12412	5.66652	4.94782	4.02074	2.96415
gs36	12	137	33.4768	2.70165e-05	1.44219	7.64601	-5.42609	1.47676	1.32482	4.62321	0	0.10107	0.193649	0.286232	0.350568	0.403753	0.440545	0.469753	0.496848	0.529484	0.571805	0.625571	0.688523	0.758052	0.83165	0.907449	0.984529	1.06223	1.14325	1.23153	1.33912	1.48073	1.68421	1.9728	2.38538	2.93107	3.63216	4.45176	5.3591	6.25563	7.05068	7.61863	7.86239	7.71091	7.14842	6.21999	5.02915	3.71393	2.41355
gs37	14	139	33.4354	2.86199e-05	2.21745	7.39903	-5.4661	1.63291	0.955285	3.49972	0	0.058877	0.162278	0.272702	0.355718	0.432838	0.496036	0.55433	0.610723	0.671244	0.737216	0.808831	0.883321	0.960067	1.04059	1.12809	1.22649	1.33828	1.46713	1.61285	1.77958	1.96643	2.18268	2.42975	2.72471	3.06769	3.47578	3.93839	4.45538	4.99035	5.50886	5.94608	6.24185	6.33347	6.17849	5.76234	5.10831	4.27145	3.34584
gs38	14.5	139.5	33.425	4.71017e-05	7.10315	18.5997
gs39	16.6d	141	33.3939	1.95304e-05			-5.6986	1.61905	0.84566	3.12107	0	0	0.151556	0.258881	0.364468	0.446625	0.527017	0.6056	0.689603	0.784335	0.88929	1.00201	1.11603	1.22852	1.33982	1.45267	1.57068	1.69569	1.83083	1.97519	2.13272	2.30362	2.49929	2.72582	3.00474	3.34078	3.75208	4.22475	4.75007	5.27812	5.75848	6.11282	6.27271	6.18006	5.80893	5.17402	4.334	3.37436	2.41274
gs40	17	142	33.3732	4.31568e-05			-5.64126	1.70135	1.11118	3.38353	0	0.116852	0.251233	0.401374	0.525788	0.647709	0.752673	0.846395	0.926253	0.995514	1.05489	1.10733	1.15525	1.20302	1.25557	1.31696	1.38856	1.46661	1.54428	1.61042	1.65801	1.68624	1.7098	1.7588	1.88295	2.13518	2.57823	3.23595	4.12047	5.15761	6.24689	7.20674	7.85775	8.02613	7.61262	6.62399	5.19813	3.57994	2.06127
gs41	20	145	33.311	1.37805e-05	1.43981	3.95039	-5.63658	1.83533	0.795152	2.9194	0	0.120845	0.254312	0.401691	0.523075	0.643551	0.751695	0.85656	0.958008	1.06066	1.16288	1.26313	1.35637	1.44008	1.5136	1.57767	1.6332	1.67978	1.7172	1.74463	1.76491	1.78533	1.82185	1.89671	2.04272	2.28678	2.66279	3.17327	3.81873	4.54458	5.28821	5.94027	6.39911	6.56613	6.38396	5.84774	5.01456	3.98695	2.91061
gs42	23	148	33.2488	1.63327e-06	2.54558	5.13703	-5.67754	1.74773	0.898131	3.06915	0	0.116191	0.250083	0.396685	0.514672	0.628469	0.725695	0.814512	0.895086	0.972814	1.04902	1.12578	1.20266	1.28072	1.36137	1.44567	1.53372	1.62316	1.7122	1.79728	1.88012	1.96445	2.06526	2.20025	2.40045	2.68674	3.08895	3.60314	4.22487	4.89763	5.56005	6.11117	6.46031	6.52419	6.25855	5.66749	4.8107	3.78772	2.73705
gs43	27	152	33.1659	1.05082e-05	0.39217	1.25491	-5.44242	1.97246	0.445796	3.0798	0	0.151901	0.279838	0.415694	0.522735	0.623002	0.706633	0.782253	0.85148	0.919846	0.988189	1.05684	1.12357	1.18863	1.25467	1.32583	1.40577	1.49505	1.59303	1.69477	1.79936	1.90642	2.02732	2.17489	2.37601	2.64703	3.01344	3.46959	4.00928	4.58021	5.12591	5.55839	5.80214	5.79335	5.50398	4.94841	4.18782	3.31444	2.44917
gs44	30	155	33.1037	8.95276e-06	1.50146	3.97633	-6.67805	1.46659	0.263431	2.33592	0	0	0.028437	0.129474	0.289363	0.455053	0.653787	0.884546	1.14929	1.44882	1.76702	2.08739	2.38691	2.65712	2.90173	3.1325	3.36254	3.59815	3.84171	4.08048	4.30362	4.49222	4.64136	4.74528	4.81075	4.83972	4.83276	4.78208	4.67012	4.4765	4.17506	3.75759	3.2284	2.62295	1.98801	1.37757	0.840497	0.42939	0.114625
gs45	44	169	32.82	4.54592e-05	10.5315	28.1221	-5.71925	1.67996	0.821946	2.97932	0	0	0.16053	0.309118	0.407513	0.514388	0.605612	0.697164	0.789858	0.891184	1.00139	1.11997	1.24115	1.36064	1.47516	1.5832	1.68459	1.7785	1.86654	1.94972	2.03532	2.13255	2.26091	2.43831	2.69355	3.03704	3.48643	4.01987	4.61713	5.21138	5.73926	6.11397	6.26885	6.15663	5.76771	5.13229	4.31722	3.4062	2.5001
gs46	50	175	32.7	7.67962e-05	9.56151	26.2983	-5.22633	1.78886	1.06186	3.33346	0	0.06365	0.169234	0.286344	0.380852	0.474023	0.556246	0.635074	0.710866	0.787946	0.866059	0.945147	1.02261	1.09807	1.17275	1.2489	1.32803	1.40829	1.48586	1.55206	1.59941	1.62121	1.61883	1.60369	1.59993	1.64436	1.78482	2.0649	2.52821	3.17811	4.00096	4.91922	5.83667	6.61676	7.13173	7.27629	6.99936	6.31641	5.32037
gs47	56	181	32.58	8.00974e-05			-5.83866	1.84527	0.5747	2.36772	0	0	0.17573	0.344605	0.463897	0.598274	0.722032	0.85319	0.99126	1.14318	1.30571	1.47533	1.6424	1.80072	1.94627	2.07739	2.19341	2.29203	2.37191	2.42921	2.46305	2.47434	2.47111	2.46909	2.49181	2.56612	2.72193	2.97591	3.34052	3.79406	4.30424	4.80185	5.21477	5.46119	5.47779	5.22898	4.72125	4.00108	3.15841
gs48	62	187	32.46	8.57168e-05			-4.55917	1.7009	1.40956	4.53818	0	0	0.115035	0.183841	0.247134	0.297101	0.344568	0.38932	0.434645	0.482719	0.532505	0.581946	0.627615	0.669008	0.708793	0.751644	0.80227	0.862982	0.933872	1.00942	1.08303	1.14389	1.18483	1.20042	1.19423	1.18038	1.18635	1.25269	1.43168	1.77055	2.31414	3.06863	4.01762	5.0862	6.16769	7.12022	7.79559	8.07485	7.88873
gs49	69	194	32.32	8.80151e-05	6.05156	17.3693	-4.9202	1.50205	1.33335	4.7571	0	0	0.104986	0.171017	0.229346	0.268889	0.301767	0.327884	0.352508	0.379662	0.41154	0.449311	0.493211	0.545734	0.611053	0.692936	0.792846	0.907172	1.02984	1.14852	1.25412	1.33746	1.40202	1.45999	1.54211	1.68741	1.95077	2.37315	2.9964	3.80877	4.78083	5.81064	6.78182	7.54299	7.96409	7.95224	7.48368	6.60902	5.45753
gs50	83	208	32.04	7.94297e-05	10.5257	29.1885	-5.24958	1.73419	1.07615	3.56527	0	0.097447	0.200833	0.310916	0.395978	0.475015	0.539741	0.59764	0.65065	0.704052	0.759458	0.817912	0.877991	0.939842	1.00526	1.07729	1.15886	1.25005	1.34978	1.45214	1.55371	1.64958	1.74425	1.8447	1.97209	2.14682	2.40217	2.75663	3.23393	3.82209	4.50386	5.21664	5.89089	6.43097	6.74909	6.77234	6.46405	5.83201	4.94056
gs51	85	210	32	9.80309e-05	6.79913	20.0747	-5.55124	1.80455	0.625609	2.69462	0	0	0.159393	0.265652	0.367817	0.44795	0.526623	0.604922	0.691172	0.792902	0.912215	1.04928	1.19819	1.35412	1.51262	1.67061	1.82588	1.97384	2.11148	2.23165	2.33191	2.40877	2.4676	2.51684	2.5752	2.66335	2.80976	3.03406	3.356	3.76664	4.24692	4.74069	5.18429	5.49779	5.61262	5.48071	5.09061	4.47018	3.69351
LG section
gs116	LaGarry20-wb+25	105	29.8	5.091e-05			-5.61681	1.62251	0.848035	3.23953	0	0.091468	0.174946	0.26256	0.327762	0.391767	0.454208	0.522356	0.601446	0.691911	0.792364	0.897811	1.00623	1.11803	1.23531	1.36062	1.49431	1.63771	1.78756	1.94512	2.10739	2.28198	2.47236	2.69703	2.96368	3.2942	3.68782	4.15043	4.65343	5.16693	5.62909	5.97993	6.15305	6.09966	5.79521	5.24979	4.50442	3.63884	2.73206
gs115	LaGarry20-wb+20	100	30.0571	0.000128872	15.3563	50.4659	-5.82509	1.67103	0.771748	2.90428	0	0.126581	0.226322	0.327233	0.404489	0.481641	0.559767	0.647716	0.752239	0.873501	1.00904	1.15083	1.2937	1.43483	1.57369	1.71092	1.84547	1.97793	2.10495	2.22763	2.34474	2.46486	2.59634	2.76062	2.97267	3.25818	3.62201	4.07135	4.57622	5.10052	5.57209	5.91864	6.06274	5.94948	5.55642	4.90536	4.05624	3.11078	2.17123
gs114	LaGarry20-wb+15	95	30.3143	0.000106568	15.7583	44.372	-5.94504	1.72455	0.589353	2.55819	0	0.105518	0.205839	0.314881	0.401509	0.492997	0.590879	0.704786	0.842051	1.00164	1.17963	1.36496	1.54968	1.72823	1.89783	2.05751	2.20476	2.33948	2.45796	2.56109	2.64817	2.727	2.80666	2.90625	3.04205	3.23729	3.50022	3.8387	4.23064	4.64668	5.02733	5.31168	5.43366	5.34513	5.02469	4.48762	3.78092	2.98737	2.18419
gs113	LaGarry20-wb+10	90	30.5714	9.66648e-05	5.72306	16.3332	-5.89544	1.63463	0.757094	2.96351	0	0.130234	0.233459	0.337789	0.416498	0.493243	0.568173	0.650063	0.745876	0.857002	0.982595	1.11662	1.25535	1.39687	1.5411	1.68905	1.83993	1.99523	2.15234	2.31424	2.47974	2.65842	2.85487	3.08762	3.36176	3.69452	4.07812	4.50975	4.95284	5.36961	5.6967	5.87612	5.85329	5.5961	5.10221	4.40487	3.56386	2.67103	1.80927
gs112	LaGarry20-wb+5	85	30.8286	9.17694e-05	12.6634	39.0505	-5.81024	1.67026	0.64824	3.04006	0	0.125617	0.221969	0.317271	0.388152	0.457244	0.525834	0.603209	0.696761	0.807984	0.935569	1.0724	1.21327	1.35477	1.49579	1.63701	1.77807	1.92133	2.0658	2.21589	2.37245	2.54662	2.74473	2.98675	3.27814	3.63609	4.04983	4.51285	4.98216	5.41415	5.74002	5.89904	5.83785	5.53002	4.98382	4.24666	3.39274	2.52623	1.734
gs108	LaGarry20-wb-0	80	31.0857	1.4008e-05			-5.87987	1.78663	0.390056	2.59931	0	0.084478	0.171087	0.274564	0.364982	0.462147	0.566598	0.685431	0.825053	0.983708	1.15703	1.33355	1.50548	1.66855	1.82243	1.96972	2.11282	2.25704	2.40362	2.55776	2.71812	2.8898	3.06867	3.25924	3.45252	3.64953	3.83955	4.02175	4.18712	4.33198	4.44547	4.51622	4.52631	4.45461	4.2796	3.98678	3.57427	3.06579	2.49448
gs109	LaGarry20-wb-5	75	31.3429				-4.87487	1.71159	1.4265	4.52181	0	0.122371	0.200005	0.276051	0.339941	0.40369	0.46594	0.528597	0.592278	0.653497	0.707818	0.749433	0.776342	0.791341	0.801285	0.81463	0.83879	0.878239	0.931393	0.992756	1.05096	1.09646	1.12126	1.12828	1.13298	1.16822	1.28099	1.53228	1.97266	2.64683	3.54741	4.63575	5.80246	6.90474	7.77145	8.24462	8.22149	7.68112	6.68607
WB Lag 24-1	wb-10	70	31.6	3.76973e-05	7.32288	17.5377	-5.97451	1.56223	0.816435	2.99257	0	0.120049	0.207244	0.289029	0.347633	0.40706	0.4733	0.55954	0.676592	0.826596	1.0067	1.20449	1.40816	1.60627	1.78981	1.95312	2.16742	2.27714	2.36739	2.45174	2.54555	2.67271	2.85244	3.11127	3.45451	3.89344	4.40025	4.94893	5.47062	5.90059	6.15609	6.17431	5.91593	5.38011	4.60948	3.68592	2.70887	1.78844	1.02079
	LaGarry20-wb-11	69	31.6514	4.61774e-06
WB Lag 24-2	wb-12	68	31.7029	1.69316e-05	3.74087	8.72869	-6.1363	1.61773	0.54271	2.56574	0	0.1102	0.203087	0.297903	0.370673	0.44832	0.536104	0.646775	0.790671	0.968332	1.17562	1.39815	1.62268	1.83646	2.02954	2.19563	2.23669	2.36611	2.47375	2.56981	2.66546	2.78092	2.93346	3.14874	3.4364	3.81253	4.26003	4.762	5.2599	5.69443	5.98301	6.05699	5.86544	5.3943	4.6741	3.77926	2.80793	1.87506	1.08143
	LaGarry20-wb-15	65	31.8571	2.94026e-05
gs110	LaGarry20-wb-17	63	31.96	5.83209e-05	12.1427	32.3848	-6.08577	1.6573	0.57834	2.62555	0	0.115047	0.22021	0.332088	0.418986	0.509138	0.604341	0.715227	0.850049	1.00875	1.18813	1.37746	1.56895	1.75701	1.93888	2.11388	2.28003	2.43855	2.58696	2.72859	2.86364	3.00214	3.15094	3.32796	3.54013	3.80205	4.10633	4.44676	4.78815	5.0928	5.30402	5.37133	5.25272	4.92878	4.40964	3.73701	2.97254	2.19939	1.48643
WB Lag 24-3	wb-18	62	32.0114	2.18715e-05	3.53398	6.88911	-5.86516	1.72647	0.326933	2.81645	0	0.098971	0.180049	0.260104	0.31848	0.379062	0.446985	0.534528	0.651761	0.800632	0.979008	1.17625	1.38304	1.59042	1.79093	1.97902	1.90138	2.03892	2.15776	2.26428	2.36531	2.47765	2.61685	2.80885	3.06796	3.4166	3.84789	4.35519	4.88931	5.39763	5.79718	6.01433	5.98485	5.67854	5.10787	4.3317	3.43821	2.54371	1.73657
gs111	LaGarry20-wb-20	60	32.1143	0.000121085	15.6195	26.1508	-5.08115	1.63409	1.04139	3.82307	0	0.073539	0.13339	0.192607	0.234666	0.274652	0.313379	0.357235	0.411114	0.476264	0.551941	0.633958	0.719673	0.808119	0.900021	0.996896	1.0984	1.20415	1.30902	1.40967	1.49955	1.57949	1.65244	1.7348	1.84765	2.02685	2.30329	2.7147	3.26848	3.96323	4.74605	5.54804	6.26215	6.78282	7.01552	6.90395	6.44369	5.69198	4.73759
WB Lag 24-4	22	58	32.2171	6.36301e-05	8.03877	12.2318	-4.87739	1.92241	0.414404	2.92445	0	0.039918	0.104668	0.155384	0.188539	0.218549	0.252018	0.295814	0.357135	0.438146	0.538404	0.652265	0.774529	0.900011	1.02421	1.14364	1.31346	1.41405	1.50603	1.59407	1.68159	1.7786	1.89269	2.03988	2.22855	2.47626	2.78348	3.1552	3.56898	4.00157	4.40379	4.72861	4.92367	4.95233	4.79907	4.47821	4.03097	3.52601	3.03032
WB Lag 24-5	24	56	32.32	2.54592e-05	5.50937	12.7807	-5.44052	1.72288	0.606533	3.05124	0	0.0954885	0.165566	0.23051	0.274742	0.31721	0.361876	0.419161	0.497605	0.599893	0.725008	0.865193	1.01313	1.16178	1.30559	1.44111	1.36413	1.47257	1.57542	1.67948	1.79005	1.9199	2.07743	2.28085	2.53655	2.86247	3.25438	3.71584	4.2191	4.73924	5.22308	5.62164	5.87814	5.95023	5.81323	5.46918	4.94447	4.29417	3.57291
WB Lag 24-6	26	54	32.4229	9.83373e-06	1.00302	3.4843	-5.37793	1.56493	1.04163	3.66164	0	0.0799375	0.139736	0.194118	0.229054	0.261927	0.296851	0.343905	0.411234	0.501614	0.614179	0.741905	0.878224	1.01687	1.15273	1.28239	1.56546	1.66033	1.74349	1.82042	1.8967	1.98568	2.10076	2.26602	2.49886	2.82802	3.25946	3.8034	4.42799	5.09688	5.7305	6.24857	6.55856	6.58983	6.30401	5.71157	4.86861	3.88159	2.86057
WB Lag 24-7	28	52	32.5257	1.23204e-05	1.26967	4.33953	-4.41727	2.63053	-0.352246	2.69532	0	0.035777	0.108961	0.172447	0.220547	0.269172	0.324761	0.392489	0.4776	0.578473	0.690888	0.805654	0.915995	1.01755	1.10859	1.18917	1.41582	1.48475	1.54133	1.58811	1.62634	1.66072	1.6968	1.74638	1.8232	1.94959	2.14376	2.42845	2.80577	3.27242	3.79072	4.3121	4.76215	5.06674	5.15959	5.00215	4.59391	3.9819	3.23595
WB Lag 24-8	30	50	32.6286	3.12059e-05	4.43794	8.73508	-5.43022	1.82353	0.611066	2.67827	0	0.0668985	0.134543	0.208088	0.2662	0.33057	0.404967	0.498584	0.61836	0.762974	0.927584	1.0999	1.26984	1.42922	1.57295	1.69883	1.57247	1.66565	1.74814	1.82231	1.88795	1.94912	2.00912	2.07874	2.16977	2.30477	2.50328	2.79219	3.17994	3.67163	4.23748	4.83539	5.39133	5.82544	6.05764	6.0294	5.71888	5.15313	4.39051
WB Lag 24-9	32	48	32.7314	5.865e-05	4.04936	9.56254	-5.38886	1.67565	0.812254	3.24621	0	0.063844	0.125213	0.190477	0.240326	0.292971	0.350556	0.420506	0.508359	0.613695	0.733542	0.859757	0.986256	1.10868	1.22479	1.33415	1.69601	1.78848	1.87127	1.95298	2.04169	2.15194	2.29438	2.48745	2.7369	3.05747	3.44009	3.88145	4.34702	4.8051	5.20011	5.48357	5.6062	5.53675	5.26546	4.81018	4.21223	3.53179	2.85531
WB Lag 24-10	34	46	32.8343	1.10194e-05	0.949788	3.55717	-5.83541	1.64301	0.761753	2.88905	0	0.115553	0.202995	0.288687	0.353316	0.419713	0.492019	0.581061	0.695429	0.835627	0.998088	1.17121	1.34477	1.50961	1.65895	1.78877	1.9362	2.03758	2.12088	2.19426	2.26691	2.35582	2.47722	2.65622	2.90752	3.25438	3.69274	4.2207	4.79413	5.36581	5.85349	6.18028	6.26979	6.07411	5.58372	4.83725	3.91085	2.92	1.96948
WB Lag 24-11	36	44	32.9371	9.62033e-06	0.411513	1.8495	-6.0295	1.61648	0.604346	2.6734	0	0.117168	0.201101	0.280343	0.339786	0.403496	0.478636	0.578067	0.711744	0.879313	1.0753	1.28495	1.49604	1.69833	1.88447	2.04998	2.2425	2.38905	2.51479	2.62855	2.73807	2.85918	3.00339	3.1905	3.428	3.73179	4.09363	4.50764	4.93431	5.33168	5.63272	5.77563	5.70396	5.38612	4.82516	4.06505	3.1785	2.2743	1.42765
WB Lag 24-12	38	42	33.04	1.07211e-05	0.48034	2.24608	-5.98874	1.53618	0.866031	3.00234	0	0.102362	0.184952	0.26467	0.320433	0.376864	0.43962	0.52232	0.636478	0.785726	0.969303	1.17725	1.4002	1.62855	1.8542	2.07138	2.62726	2.80632	2.9609	3.09684	3.21823	3.33881	3.46886	3.62688	3.81965	4.0588	4.33399	4.63393	4.92007	5.15113	5.27122	5.23184	4.99794	4.55899	3.93664	3.18468	2.37554	1.59442	0.930523
WB Lag 24-13	40	40	33.1429	8.66141e-06	0.394404	2.03769	-6.23445	1.70144	0.34613	2.2776	0	0.094349	0.192547	0.301211	0.38847	0.485363	0.596851	0.735972	0.913215	1.12785	1.37497	1.63891	1.90652	2.16559	2.40664	2.62327	2.6924	2.84865	2.97303	3.06894	3.13883	3.19258	3.2407	3.30022	3.38654	3.51916	3.70627	3.95316	4.24032	4.53946	4.79764	4.95924	4.96673	4.77916	4.38234	3.79754	3.0754	2.30122	1.5481
WB Lag 24-14	42	38	33.2457	8.59294e-06	0.471677	2.02096	-5.80556	1.88689	0.228134	2.37973	0	0.072052	0.156967	0.253439	0.330144	0.414543	0.509742	0.626528	0.773491	0.950257	1.15327	1.37041	1.59178	1.80841	2.01337	2.20186	1.9746	2.09083	2.18805	2.27118	2.34378	2.41528	2.49372	2.59395	2.72661	2.90984	3.14993	3.45638	3.81525	4.20945	4.59534	4.92663	5.14605	5.20572	5.07347	4.74442	4.24202	3.62359	2.9513
WB Lag 24-15	44	36	33.3486	9.78243e-06	0.445072	2.0904	-5.32287	2.03458	0.260385	2.4738	0	0.086664	0.158161	0.229762	0.283761	0.341628	0.408407	0.4949	0.609758	0.753395	0.922112	1.10389	1.28803	1.46487	1.62747	1.77213	1.60477	1.70383	1.79185	1.87542	1.95882	2.05043	2.15368	2.2769	2.42044	2.59223	2.7904	3.02033	3.27472	3.55016	3.8292	4.09494	4.32056	4.47978	4.5468	4.50307	4.34211	4.07495	3.72246
gs107	LaGarry30 ss+24	35	33.4	5.29864e-05	3.26105	4.95921	-5.98412	1.85054	0.501441	2.26516	0	0.120684	0.229247	0.35035	0.455136	0.571628	0.702171	0.855495	1.03844	1.24703	1.47436	1.70418	1.92323	2.12012	2.28702	2.41899	2.51165	2.56409	2.57597	2.55108	2.49831	2.43112	2.37241	2.34755	2.38622	2.5167	2.75482	3.11097	3.56294	4.0789	4.59097	5.02873	5.31149	5.37705	5.18987	4.754	4.11096	3.34325	2.53403
gs106	LaGarry30 ss+20	31	33.5	1.6623e-05	1.59825	4.26584	-5.45291	1.90575	0.65268	2.66018	0	0.06948	0.154742	0.257507	0.346113	0.444881	0.553566	0.677872	0.821422	0.979289	1.14427	1.30259	1.44391	1.56156	1.65397	1.72333	1.77303	1.80789	1.83093	1.84511	1.85266	1.85824	1.86998	1.90211	1.97268	2.10757	2.32793	2.6589	3.10075	3.64641	4.24872	4.84942	5.36327	5.70891	5.81689	5.65079	5.21721	4.57358	3.79993
gs105	LaGarry30 ss+17	28	33.7	2.01006e-05	1.59165	4.65101	-5.48432	1.92738	0.757699	2.68468	0	0.12985	0.231166	0.340594	0.436665	0.541352	0.65526	0.783531	0.929287	1.08634	1.24573	1.39187	1.51302	1.60231	1.65916	1.68748	1.6936	1.68515	1.66937	1.65226	1.63985	1.63873	1.65832	1.71291	1.818	1.99681	2.26413	2.64004	3.11822	3.68832	4.30177	4.90302	5.41296	5.75902	5.88056	5.74625	5.36137	4.77424	4.05109
gs103-104	LaGarry30 ss+15	26	33.8	2.20045e-05	4.15592	7.19574	-5.73346	1.92204	0.817959	2.65999	0.092058	0.223693	0.374479	0.504768	0.641522	0.772843	0.907473	1.04202	1.1771	1.30447	1.41642	1.50331	1.56222	1.59657	1.61418	1.62423	1.63509	1.65269	1.6787	1.71212	1.74922	1.78958	1.83587	1.90107	2.00274	2.17093	2.43052	2.81222	3.31804	3.94126	4.628	5.30946	5.88333	6.24965	6.32207	6.05442	5.45291	4.5882	3.55842
	LaGarry30 ss+11	22	34	1.03898e-05	1.04242	3.52226
gs102	LaGarry30 ss+7	18	34.2	2.86481e-05	5.01411	7.23019	-5.64576	1.86409	0.82679	2.68229	0	0.122923	0.237435	0.370556	0.488851	0.6163	0.748684	0.887723	1.03339	1.17818	1.31465	1.43247	1.52742	1.60046	1.65642	1.70111	1.73883	1.77207	1.79938	1.81807	1.82489	1.82089	1.8144	1.82322	1.87415	2.0035	2.24405	2.63098	3.16821	3.84773	4.60929	5.37573	6.03298	6.47002	6.59074	6.3428	5.73118	4.83052	3.74668
gs101	LaGarry30 ss+4	16	34.3	1.71798e-05			-5.5327	1.83064	1.0153	3.19056	0.074018	0.193419	0.330184	0.446317	0.564891	0.673233	0.777513	0.874403	0.965106	1.04573	1.11372	1.16574	1.20275	1.22974	1.25426	1.2838	1.32311	1.37364	1.43138	1.49151	1.54782	1.60138	1.65869	1.74018	1.87106	2.08956	2.42327	2.90367	3.52429	4.26857	5.06614	5.83437	6.4586	6.83319	6.87252	6.53808	5.84884	4.89213	3.77843
gs100-2	LaGarry30 ss+1	12	34.45	1.47004e-05	0.254255	1.19081	-4.7312	1.55965	1.34954	4.70703	0	0.064511	0.113626	0.160928	0.194048	0.224476	0.252404	0.282259	0.316968	0.356786	0.400579	0.445788	0.492333	0.542908	0.601988	0.674217	0.76174	0.865084	0.978394	1.09562	1.20449	1.29809	1.36843	1.41947	1.46215	1.52386	1.64136	1.86503	2.23713	2.79777	3.54642	4.45963	5.45689	6.42954	7.24096	7.75679	7.87842	7.56253	6.83035
gs100-1	LaGarry30 ss+1	11	34.5				-5.17437	1.96488	0.938627	3.08258	0	0.155072	0.267091	0.386507	0.491002	0.597977	0.702562	0.80497	0.90442	0.995401	1.0727	1.12976	1.16456	1.17993	1.18279	1.18149	1.18378	1.19503	1.21711	1.24997	1.29197	1.34509	1.41284	1.50758	1.64065	1.83271	2.09377	2.43911	2.86021	3.34817	3.86631	4.37939	4.83938	5.2086	5.45831	5.57497	5.55818	5.41048	5.12477
[truncated: 23 more columns]
